# Supplementary material
Source: Elsevier journal article supplement (https://comptes-rendus.academie-sciences.fr/geoscience/article/10.1016/j.crte.2015.02.008/file/attach/mmc5.pdf)
Supplement: mmc5 [file mmc5.pdf]

Table 1. Sr, Nd and Pb isotope data for ACEX composite sediment core

| Pot          | Sample 302-2A-         | depth (mcd) | Age model Z <sup>a</sup> (Ma) | Sr87/86 residue | 2 $\sigma$ error | Nd   | Sm   | 147/144Nd residue | 143/144Nd residue | 2 $\sigma$ error | eNd(0) | eNd(t) | T <sub>DM</sub> | Pb <sup>b</sup> ppm | U <sup>b</sup> ppm | Th <sup>b</sup> ppm | 238U/204Pb <sup>c</sup> mu | 232Th/204Pb <sup>c</sup> kappa | 206/204 measured isotope ratios | 207/204 measured isotope ratios | 208/204 measured isotope ratios | 206/204 age corrected residues <sup>d</sup> | 207/204 age corrected residues <sup>d</sup> | 208/204 age corrected residues <sup>d</sup> | 208/206 |  |
|--------------|------------------------|-------------|-------------------------------|-----------------|------------------|------|------|-------------------|-------------------|------------------|--------|--------|-----------------|---------------------|--------------------|---------------------|----------------------------|--------------------------------|---------------------------------|---------------------------------|---------------------------------|---------------------------------------------|---------------------------------------------|---------------------------------------------|---------|--|
| 302-13       | 302-2a-1X1W-2-3cm      | 1.25        | 0.09                          |                 |                  |      |      |                   |                   |                  |        |        |                 | 492                 | 2.16               | 10.21               | 0.27                       | 1.32                           | 18.871                          | 15.671                          | 38.405                          | 18.871                                      | 15.671                                      | 38.405                                      | 2.035   |  |
| 302-1        | 1X 1W 12-13 cm         | 1.35        | 0.09                          | 0.71831         | 0.00001          | 23.4 | 4.2  | 0.1086            | 0.512065          | 0.000010         | -11.2  | -11.2  | 1.6             | 23.34               | 2.11               | 9.76                | 5.61                       | 26.72                          | 18.755                          | 15.608                          | 38.649                          | 18.755                                      | 15.608                                      | 38.649                                      | 2.061   |  |
| 302-17       | 1X 1W 22-23cm          | 1.45        | 0.10                          |                 |                  |      |      |                   |                   |                  |        |        |                 |                     |                    |                     |                            |                                | 18.243                          | 15.558                          | 38.162                          | 18.243                                      | 15.558                                      | 38.162                                      | 2.092   |  |
| 302-14       | 1X 1W 32-33cm          | 1.55        | 0.11                          | 0.71697         | 0.00001          |      |      |                   |                   |                  |        |        |                 |                     |                    |                     |                            |                                | 18.438                          | 15.579                          | 38.403                          | 18.438                                      | 15.579                                      | 38.403                                      | 2.083   |  |
| 302-18       | 1X 1W 42-43cm          | 1.65        | 0.11                          |                 |                  |      |      |                   |                   |                  |        |        |                 |                     |                    |                     |                            |                                | 18.536                          | 15.577                          | 38.523                          | 18.536                                      | 15.577                                      | 38.523                                      | 2.078   |  |
| 302-15       | 1X 1W 62-63cm          | 1.85        | 0.13                          | 0.71701         | 0.00001          |      |      |                   |                   |                  |        |        |                 |                     |                    |                     |                            |                                | 18.532                          | 15.583                          | 38.631                          | 18.532                                      | 15.583                                      | 38.631                                      | 2.085   |  |
| 302-16       | 1X 1W 92-93cm          | 2.15        | 0.15                          |                 |                  |      |      |                   |                   |                  |        |        |                 |                     |                    |                     |                            |                                | 18.324                          | 15.572                          | 38.288                          | 18.324                                      | 15.572                                      | 38.288                                      | 2.089   |  |
| 302-2        | 11X 2W 75-76 cm        | 50.69       | 3.5                           | 0.71592         | 0.00001          | 26.6 | 4.8  | 0.1088            | 0.512090          | 0.000010         | -10.7  | -10.7  | 1.5             | 14.13               | 2.78               | 10.11               | 12.18                      | 45.68                          | 18.505                          | 15.564                          | 38.609                          | 18.499                                      | 15.564                                      | 38.602                                      | 2.087   |  |
| 302-3        | 23X 2W 22-23 cm        | 101.55      | 7.0                           | 0.71679         | 0.00002          | 36.6 | 9.1  | 0.1497            | 0.512089          | 0.000012         | -10.7  | -10.7  | 2.5             | 12.85               | 2.93               | 10.53               | 14.13                      | 52.32                          | 18.544                          | 15.578                          | 38.638                          | 18.529                                      | 15.577                                      | 38.620                                      | 2.084   |  |
| 302-4        | 34X 2W 22-23 cm        | 150.72      | 12.3                          | 0.71637         | 0.00002          | 35.7 | 6.8  | 0.1159            | 0.512119          | 0.000011         | -10.1  | -10.0  | 1.6             | 37.16               | 2.29               | 10.32               | 3.82                       | 17.73                          | 18.477                          | 15.568                          | 38.555                          | 18.470                                      | 15.567                                      | 38.545                                      | 2.087   |  |
| 35x          | 35X 2W 18-19cm         | 154.45      | 14.0                          | 0.7163          | 0.00002          |      |      |                   |                   |                  |        |        |                 | 14.76               | 2.40               | 10.59               | 10.10                      | 45.80                          | 18.566                          | 15.580                          | 38.654                          | 18.544                                      | 15.579                                      | 38.622                                      | 2.083   |  |
| 37x          | 37X 2W 27-28cm         | 164.28      | 19.2                          | 0.71620         | 0.00018          |      |      |                   |                   |                  |        |        |                 | 18.38               | 2.65               | 11.09               | 8.94                       | 38.54                          | 18.553                          | 15.589                          | 38.661                          | 18.526                                      | 15.587                                      | 38.625                                      | 2.085   |  |
| 38x          | 38X 2W 27-28cm         | 167.16      | 20.7                          | 0.714138        | 0.00001          | 33.1 | 6.6  | 0.1196            | 0.512087          | 0.000010         | -10.8  | -10.6  | 1.7             | 19.72               | 2.54               | 10.44               | 8.00                       | 33.80                          | 18.565                          | 15.590                          | 38.761                          | 18.539                                      | 15.589                                      | 38.726                                      | 2.089   |  |
| 40x          | 40X 2W 27-28cm         | 174.85      | 24.8                          | 0.71483         | 0.00001          |      |      |                   |                   |                  |        |        |                 | 23.03               | 2.87               | 12.08               | 7.73                       | 33.49                          | 18.542                          | 15.581                          | 38.668                          | 18.512                                      | 15.579                                      | 38.627                                      | 2.087   |  |
| 42x          | 42X 2W 27-28cm         | 184.26      | 29.7                          | 0.71485         | 0.00002          | 40.7 | 8.2  | 0.1218            | 0.512093          | 0.000010         | -10.6  | -10.3  | 1.8             | 22.77               | 2.59               | 11.99               | 7.06                       | 33.62                          | 18.492                          | 15.574                          | 38.628                          | 18.459                                      | 15.573                                      | 38.578                                      | 2.090   |  |
| 302-5        | 43X 2W 22-23 cm        | 189.20      | 32.3                          | 0.71427         | 0.00001          | 36.6 | 7.1  | 0.1170            | 0.512072          | 0.000010         | -11.0  | -10.7  | 1.7             | 24.92               | 2.26               | 12.64               | 5.64                       | 32.38                          | 18.448                          | 15.563                          | 38.629                          | 18.420                                      | 15.561                                      | 38.577                                      | 2.094   |  |
| 302-5 dupl   | 43X 2W 22-23 cm dup.   | 189.20      | 32.3                          | 0.71396         | 0.00002          |      |      |                   |                   |                  |        |        |                 |                     |                    |                     |                            |                                |                                 |                                 |                                 |                                             |                                             |                                             |         |  |
| 302-22       | 44X 3W 60-61 cm        | 189.58      | 32.5                          |                 |                  |      |      |                   |                   |                  |        |        |                 | 21.44               | 8.07               | 13.37               | 23.36                      | 39.81                          |                                 |                                 |                                 |                                             |                                             |                                             |         |  |
| 302-6        | 44X 1W 76-77 cm        | 192.75      | 34.2                          | 0.71026         | 0.00002          | 36.4 | 6.9  | 0.1150            | 0.512105          | 0.000010         | -10.4  | -10.0  | 1.6             | 24.06               | 1.70               | 11.33               | 4.38                       | 30.08                          | 18.485                          | 15.573                          | 38.617                          | 18.462                                      | 15.572                                      | 38.566                                      | 2.089   |  |
| 302-6 dupl   | 44X 1W 76-77 cm dup.   | 192.75      | 34.2                          | 0.710168        |                  |      |      |                   |                   |                  |        |        |                 |                     |                    |                     |                            |                                |                                 |                                 |                                 |                                             |                                             |                                             |         |  |
| 302-7        | 44X 2W 95-96 cm        | 194.44      | 35.1                          | 0.71380         | 0.00001          | 49.8 | 10.2 | 0.1243            | 0.512171          | 0.000010         | -9.1   | -8.8   | 1.7             | 29.69               | 8.88               | 16.57               | 18.55                      | 35.64                          | 18.556                          | 15.582                          | 38.627                          | 18.455                                      | 15.577                                      | 38.565                                      | 2.090   |  |
| 302-23       | 44X 1W 106-107 cm      | 194.44      | 35.1                          |                 |                  |      |      |                   |                   |                  |        |        |                 | 29.85               | 5.27               | 12.28               | 10.96                      | 26.27                          |                                 |                                 |                                 |                                             |                                             |                                             |         |  |
| 302-24       | 45X 1W 3-4 cm          | 195.96      | 35.9                          | 0.71525         | 0.00001          |      |      |                   |                   |                  |        |        |                 | 19.90               | 7.97               | 12.47               | 24.85                      | 40.01                          |                                 |                                 |                                 |                                             |                                             |                                             |         |  |
| 302-8        | 45X 1W 57-58 cm b      | 196.5       | 36.2                          | 0.71278         | 0.00002          | 41.1 | 10.7 | 0.1570            | 0.512188          | 0.000010         | -8.8   | -8.6   | 2.6             | 18.20               | 22.17              | 12.04               | 75.61                      | 0.00                           | 18.934                          | 15.612                          | 38.675                          | 18.508                                      | 15.592                                      | 38.675                                      | 2.090   |  |
| 302-8 dupl   | 45X 1W 57-58 cm dup. b | 196.5       | 36.2                          | 0.71223         | 0.00001          |      |      |                   |                   |                  |        |        |                 | 18.20               | 22.17              | 12.04               | 75.61                      | 42.25                          | 18.892                          | 15.599                          | 38.618                          | 18.466                                      | 15.579                                      | 38.543                                      | 2.087   |  |
| 302-8 b      | 45X 1W 57-58 cm b      | 196.5       | 36.2                          |                 |                  |      |      |                   |                   |                  |        |        |                 | 18.20               | 22.17              | 12.04               | 75.61                      | 0.00                           | 18.848                          | 15.598                          | 38.620                          | 18.422                                      | 15.579                                      | 38.620                                      | 2.096   |  |
| 302-8 b dupl | 45X 1W 57-58 cm b      | 196.5       | 36.2                          |                 |                  |      |      |                   |                   |                  |        |        |                 | 18.20               | 22.17              | 12.04               | 75.61                      | 0.00                           |                                 |                                 |                                 |                                             |                                             |                                             |         |  |
| 302-8 c      | 45X 1W 57-58 cm dup. b | 196.5       | 36.2                          |                 |                  |      |      |                   |                   |                  |        |        |                 | 19.10               | 21.62              | 13.83               | 70.25                      | 46.24                          |                                 |                                 |                                 |                                             |                                             |                                             |         |  |
| 302-25       | 45X 1W 110-111 cm      | 197.03      | 36.2                          |                 |                  |      |      |                   |                   |                  |        |        |                 | 19.24               | 17.56              | 14.06               | 56.64                      | 46.66                          |                                 |                                 |                                 |                                             |                                             |                                             |         |  |
| 302-9        | 46X 2W 131-132 cm      | 199.81      | 36.6                          | 0.71503         | 0.00002          | 20.7 | 3.9  | 0.1137            | 0.512081          | 0.000009         | -10.9  | -10.5  | 1.6             |                     |                    |                     |                            |                                |                                 |                                 |                                 |                                             |                                             |                                             |         |  |
| 302-9 dup    | 46X 2W 131-132 cm dup. | 199.81      | 36.6                          |                 |                  |      |      |                   |                   |                  |        |        |                 | 24.11               | 9.89               | 9.06                | 25.44                      | 24.00                          | 18.802                          | 15.597                          | 38.694                          | 18.657                                      | 15.591                                      | 38.651                                      | 2.072   |  |
| 302-10       | 46X 2W 132-133 cm      | 199.82      | 36.6                          | 0.71455         | 0.00001          | 14.9 | 2.9  | 0.1181            | 0.512111          | 0.000008         | -10.3  | -9.9   | 1.7             | 22.24               | 25.66              | 10.32               | 71.61                      | 29.64                          | 18.898                          | 15.597                          | 38.607                          | 18.490                                      | 15.578                                      | 38.554                                      | 2.085   |  |
| 302-11       | 48X 2W 21-22 cm        | 208.41      | 37.7                          | 0.71942         | 0.00001          | 16.2 | 3.0  | 0.1117            | 0.512058          | 0.000045         | -11.3  | -10.9  | 1.6             | 24.58               | 7.81               | 9.14                | 19.71                      | 23.75                          | 18.820                          | 15.604                          | 38.735                          | 18.705                                      | 15.598                                      | 38.690                                      | 2.068   |  |
| 302-20       | 51X 2W 6-7 cm          | 220.00      | 39.1                          | 0.71793         | 0.00003          |      |      |                   |                   |                  |        |        |                 | 13.46               | 5.37               | 6.77                | 24.78                      | 32.14                          | 18.752                          | 15.582                          | 38.644                          | 18.601                                      | 15.575                                      | 38.582                                      | 2.074   |  |
| 302-20 dupl  | 51X 2W 6-7 cm          | 220.00      | 39.1                          |                 |                  |      |      |                   |                   |                  |        |        |                 |                     |                    |                     |                            |                                |                                 |                                 |                                 |                                             |                                             |                                             |         |  |
| 302-21       | 54X 1W 22-23 cm        | 230.22      | 40.3                          | 0.71377         | 0.00009          |      |      |                   |                   |                  |        |        |                 | 6.42                | 6.67               | 3.01                | 64.47                      | 29.89                          | 18.878                          | 15.597                          | 38.685                          | 18.474                                      | 15.579                                      | 38.625                                      | 2.091   |  |
| 302-12       | 56X 2W 95-96 cm        | 241.18      | 41.6                          | 0.71688         | 0.00001          | 19.8 | 3.8  | 0.1155            | 0.512217          | 0.000007         | -8.2   | -7.8   | 1.4             | 7.86                | 11.19              | 5.66                | 88.32                      | 46.00                          | 19.060                          | 15.612                          | 38.703                          | 18.488                                      | 15.586                                      | 38.608                                      | 2.088   |  |
| 302-12 dupl  | 56X 2W 95-96 cm dup.   | 241.18      | 41.6                          |                 |                  |      |      |                   |                   |                  |        |        |                 |                     |                    |                     |                            |                                |                                 |                                 |                                 |                                             |                                             |                                             |         |  |
| 302-19       | 58X 2W 60-61 cm        | 252.00      | 42.9                          | 0.718393        | 0.00003          |      |      |                   |                   |                  |        |        |                 | 7.18                | 6.38               | 4.41                | 55.09                      | 39.16                          | 19.032                          | 15.606                          | 38.744                          | 18.664                                      | 15.589                                      | 38.661                                      | 2.071   |  |
| 302-19 dupl  | 58X 2W 60-61 cm dup.   | 252.00      | 42.9                          | 0.718529        | 0.00003          |      |      |                   |                   |                  |        |        |                 |                     |                    |                     |                            |                                |                                 |                                 |                                 |                                             |                                             |                                             |         |  |

a. model age from Poinier and Hillaire-Marcel (2009, 2011)

b. concentrations from Table A1

c. Mu and kappa ratios calculated from U, Th and Pb concentrations

d. age corrected lead isotope ratios calculated using above mu and kappa values and decay constants for U235, U238 and Th 232
